# Supplementary material
Source: PubMed Central journal article supplement (PMC6591882)
Supplement: 809339_Appendix_3.pdf [file 809339_Appendix_3.pdf]

### APPENDIX 3

**Table A.3.1.** Baseline Characteristics of Eligible Studies

| Study Identification     | Population Characteristics                                                                                               | Study Design | Exposure                                                                           | Outcome                                                                                                           | Mean Age at Initiation of Cannabis Use (Years) | Mean Length of Follow-Up | Covariates                                                                                                                                                             | Results                                                                                                                                                                                                                                                                               |
|--------------------------|--------------------------------------------------------------------------------------------------------------------------|--------------|------------------------------------------------------------------------------------|-------------------------------------------------------------------------------------------------------------------|------------------------------------------------|--------------------------|------------------------------------------------------------------------------------------------------------------------------------------------------------------------|---------------------------------------------------------------------------------------------------------------------------------------------------------------------------------------------------------------------------------------------------------------------------------------|
| Andreasson et al. (1987) | 45,570 Swedish conscripts<br><br>Sweden<br><br>% Male: 100<br><br>Mean age: NR <sup>1</sup><br>(Age range: 18 to 20)     | Cohort       | Self-reported cannabis use                                                         | Schizophrenia at 15-year follow-up                                                                                | NA <sup>2</sup>                                | 15 years                 | Socioeconomic status, prior psychiatric diagnosis, other substance abuse, father's alcohol abuse, parental divorce, disturbed conditions of upbringing, police contact | A dose-response relationship between cannabis use at age 18 and greater future risk for developing schizophrenia at follow up;<br><br>Higher relative risk (RR) for schizophrenia among high consumers of cannabis (> 50 times) compared to non-users (RR = 6.0; 95% CI = [4.0, 8.9]) |
| Arseneault, (2002)       | 759<br><br>% Male: NR<br><br>Mean Age: NR<br><br>New Zealand<br><br>Recruitment as part of the Dunedin Multidisciplinary | Cohort       | Drug use at ages 15 and 18<br><br>Controls vs. Cannabis users by age 15 and age 18 | Psychiatric symptoms (Symptoms of schizophrenia, depression, Diagnosis of schizophreniform disorders, depression) | NA                                             | Follow-up at age 26      | Psychotic symptoms at age 11, use of other drugs during adolescence                                                                                                    | All participants were male<br>Cannabis users by age 15 and by age 18 had more schizophrenia symptoms than controls at age 26, which remained significant after controlling for psychotic symptoms at age 11,<br><br>Cannabis use by age 15 did not predict depressive                 |

<sup>1</sup> Not reported

<sup>2</sup> Not available

|                          |                                                                                                                                                                                         |              |                                                                                                      |                                                                                                 |                                                                                                                     |                                                                                                                                    |                                                                                                                  |                                                                                                                                                                                                                                  |
|--------------------------|-----------------------------------------------------------------------------------------------------------------------------------------------------------------------------------------|--------------|------------------------------------------------------------------------------------------------------|-------------------------------------------------------------------------------------------------|---------------------------------------------------------------------------------------------------------------------|------------------------------------------------------------------------------------------------------------------------------------|------------------------------------------------------------------------------------------------------------------|----------------------------------------------------------------------------------------------------------------------------------------------------------------------------------------------------------------------------------|
|                          | Health and Development Study                                                                                                                                                            |              |                                                                                                      |                                                                                                 |                                                                                                                     |                                                                                                                                    |                                                                                                                  | outcomes at age 26<br>No sex differences reported                                                                                                                                                                                |
| Bechtold et al. (2015)   | 506 boys in seventh grade (249 included in follow-up)<br><br>USA<br><br>% Male: 100<br><br>Mean Age at start: 14<br><br>Data taken from the oldest cohort of the Pittsburgh Youth Study | Cohort       | Different developmental patterns of cannabis use from early-adolescence to young adulthood (mid-20s) | Psychosis (among other physical and mental health outcomes)                                     | NA                                                                                                                  | From age 15 to age 26 (Every 6 months for 2.5 years, then annually for an additional 10 assessments<br>Final assessment at age 36) | Socioeconomic status, co-occurring use of other substances, prior physical/mental health, access to medical care | The various cannabis trajectory groups were not significantly different from one another in terms of physical and mental health outcomes in the mid-30s<br><br>All participants were male, thus sex differences not investigated |
| Cloak et al. (2015).     | 122 participants (80 cannabis users and 42 controls) between the ages of 13 to 23 years recruited from a community in Hawaii<br><br>Controls – used cannabis less than 5 times          | Case-control | Cannabis use vs non-use measured through self-report                                                 | Psychiatric symptoms measured through Symptoms Checklist-90R and Brief Psychiatric Rating Scale | Controls: 18.5 (SD = 0.8)<br><br>Light cannabis users: 15.7 (SD = 0.4)<br><br>Heavy cannabis users: 13.9 (SD = 0.4) | NA                                                                                                                                 | Number of tobacco cigarettes smoked in lifetime, alcohol use                                                     | Younger age at initiation of cannabis use was associated with more psychiatric symptoms: Paranoid ideation ( $r = -0.24$ $p = .031$ )<br><br>No sex difference reported                                                          |
| Degenhardt et al. (2012) | 1756 adolescents followed to                                                                                                                                                            | Cohort       | Cannabis use and dependence                                                                          | Major depressive episode (MDE) and anxiety                                                      | NA                                                                                                                  | 15-year with 9 waves (adolescence to age 29)                                                                                       | Sex, neither parent having completed secondary                                                                   | Daily cannabis use associated with anxiety disorder at 29 years [Adjusted OR = 2.5, 95%                                                                                                                                          |



|                        |                                                                                                                                                                                 |                 |                                                                      |                                                                                                                                                     |                                                                                                                                   |    |                   |                                                                                                                                                                                                                                                                                                                                                                                                          |
|------------------------|---------------------------------------------------------------------------------------------------------------------------------------------------------------------------------|-----------------|----------------------------------------------------------------------|-----------------------------------------------------------------------------------------------------------------------------------------------------|-----------------------------------------------------------------------------------------------------------------------------------|----|-------------------|----------------------------------------------------------------------------------------------------------------------------------------------------------------------------------------------------------------------------------------------------------------------------------------------------------------------------------------------------------------------------------------------------------|
|                        |                                                                                                                                                                                 |                 |                                                                      |                                                                                                                                                     |                                                                                                                                   |    |                   | No difference in association according to sex                                                                                                                                                                                                                                                                                                                                                            |
| Di Forti et al. (2014) | 410 first episode psychosis patients<br><br>UK<br><br>% Male: 66<br><br>Mean age: NR<br>(Age range: 18-65)<br><br>Recruitment as part of the Genetics and Psychosis (GAP) Study | Cohort          | Patterns of cannabis use                                             | Age of Onset of Psychosis (AOP)                                                                                                                     | 16.04 ( <i>SD</i> = 4.3)                                                                                                          | NA | Ethnicity, gender | The patients who started cannabis use at age 15 or younger had an earlier onset of psychosis (Mean years = 27.0, <i>SD</i> = 6.2, Median Years = 26.9) than those who had started after 15 years of age (mean years = 29.1, <i>SD</i> = 8.5, median years = 27.8; <i>HR</i> = 1.40, 95% <i>CI</i> = [1.06, 1.84])<br><br>Within each gender, cannabis use was associated with earlier onset of psychosis |
| Estrada et al. (2011)  | 157 Caucasian psychiatric inpatients<br><br>Classified into 2 groups:<br><br>80 with schizophrenia-spectrum disorders<br><br>77 with non-psychotic disorders                    | Cross-sectional | Cannabis use vs non-use measured through a semi-structured interview | Age at onset of admission for psychosis measured through interviews with patients, information provided by relatives, and review of medical records | Schizophrenia-spectrum group: 14.6 years ( <i>SD</i> = 1.61)<br><br>Non-psychotic disorders group: 13.8 years ( <i>SD</i> = 1.44) | NA | NA                | age at first cannabis use correlates with age at onset in both schizophrenia-spectrum and other psychiatric disorder groups<br><br>No gender differences were reported.                                                                                                                                                                                                                                  |

|                         | Mean age = 17.01<br>SD = 3.6                                                                                                                                                       |                 |                                                                                |                                                                                                  |    |        |                                                                                                                                                                                                                                                                                              |                                                                                                                                                                                                                                                                                                                                                                                                              |
|-------------------------|------------------------------------------------------------------------------------------------------------------------------------------------------------------------------------|-----------------|--------------------------------------------------------------------------------|--------------------------------------------------------------------------------------------------|----|--------|----------------------------------------------------------------------------------------------------------------------------------------------------------------------------------------------------------------------------------------------------------------------------------------------|--------------------------------------------------------------------------------------------------------------------------------------------------------------------------------------------------------------------------------------------------------------------------------------------------------------------------------------------------------------------------------------------------------------|
| Faiman & Anthony (2012) | 173,775<br>community-dwelling adult participants<br><br>USA<br><br>% Male: NR<br><br>Mean age: NR<br><br>Data from the National Surveys on Drug Use and Health (NSDUH) (2005-2009) | Cross-sectional | Early onset cannabis use ( $\leq 18$ )                                         | Incident depression spell during adulthood                                                       | NA | NA     | Sex, age, race/ ethnicity, years of cannabis involvement, tobacco cigarette onset, alcohol onset                                                                                                                                                                                             | Both early-onset ( $\leq 18$ years) and adult-onset ( $> 18$ years) cannabis smokers had a modest excess odd of a depression spell compared to never cannabis smokers, even with covariate adjustment ( $OR = 1.7$ and $1.8$ , respectively; both $p < .001$ )<br><br>Estimates for early- and adult-onset cannabis smokers did not statistically differ from one another<br><br>No sex differences reported |
| Fergusson et al. (1996) | 927 children recruited as part of Christchurch Health and Developmental Study,<br><br>New Zealand,<br><br>% Male: NR<br><br>Mean age: NR (Age range: 14-15)                        | Cohort          | Cannabis users (Identified from self-report or parental reports) vs. non-users | Depression and anxiety (Self-reports using the Diagnostic Interview Schedule for Children, DISC) | NA | 1 year | Family and social background (Family social position, family functioning, family history of alcohol or drug abuse), individual characteristics (childhood behavioural problems and cognitive abilities, commitment to education at age 15, peer affiliation at age 15, adjustment at age 15) | After adjustment for confounders including family disadvantages, early adjustment problems, substance using and delinquent peers, no more significant differences in risk between the cannabis users and non-users: (Depression: $OR = 1.4$ , $95\% CI = [0.7, 2.7]$ ; Anxiety: $OR = 1.2$ , $95\% CI = [0.5, 2.8]$ )<br><br>No sex differences reported                                                     |

| Study-based recruitment         |                                                                                                                                                                                          |                 |                                                                                                                      |                                                                                                                                                           |                   |    |                                                                                                                                                                                                                                                                                                                             |                                                                                                                                                                                                                                                                                                                                                             |
|---------------------------------|------------------------------------------------------------------------------------------------------------------------------------------------------------------------------------------|-----------------|----------------------------------------------------------------------------------------------------------------------|-----------------------------------------------------------------------------------------------------------------------------------------------------------|-------------------|----|-----------------------------------------------------------------------------------------------------------------------------------------------------------------------------------------------------------------------------------------------------------------------------------------------------------------------------|-------------------------------------------------------------------------------------------------------------------------------------------------------------------------------------------------------------------------------------------------------------------------------------------------------------------------------------------------------------|
| Fergusson et al. (2003)         | 1025 adolescents and young adults<br><br>% Male: NR<br><br>Mean Age: NR<br><br>New Zealand<br><br>Data taken from longitudinal study of Christchurch Health and Development Study (CHDS) | Cohort          | Cannabis dependence at ages 18 and 21                                                                                | Rates of psychotic symptoms                                                                                                                               | NA                | NA | Pre-existing psychotic symptoms, substance use, anxiety and major depression in the preceding 12 months, deviant peers, adverse life events, age of leaving the family home<br><br>sociodemographic factors, family functioning, parental adjustment, individual characteristics, prior mental health, adjustment measures, | Following adjustment for confounding factors, those with cannabis dependence still had an increased rate of psychotic symptoms (rate ratio: 1.8; 95% CI: [1.2-2.6]; $p < .005$ )<br><br>No sex differences reported                                                                                                                                         |
| Galvez-Buccollini et al. (2012) | 57 people aged 18 to 39 years with non-affective psychosis<br><br>USA<br><br>% Male: 82.5<br><br>Mean age: 25.2                                                                          | Cross-sectional | History of cannabis use (Heavy cannabis use was defined as a history of using cannabis 50 or more times in one year) | Age at onset of psychosis (the age when the patient first experienced delusions, hallucinations, disorganized speech, disorganized or catatonic behavior) | 15.4 ( $SD = 3$ ) | NA | Age, sex, lifetime diagnosis of alcohol abuse or dependence, family history of schizophrenia in a first degree relative                                                                                                                                                                                                     | Found a significant association between age at initiation of cannabis use and age at onset of psychosis ( $\beta = 0.4$ , 95% $CI = [0.1, 0.7]$ , $p = .004$ ) as well as age at first hospitalization following psychosis onset ( $\beta = 0.4$ , 95% $CI = [0.1, 0.8]$ , $p = .008$ ) after adjustment for confounders<br><br>No sex differences reported |

|                           |                                                                                                                                                                                               |                 |                                                                                                                        |                                                                                                                                                                                                      |                                     |                        |                                                                                                                                                                                                    |                                                                                                                                                                                                                                                                                            |
|---------------------------|-----------------------------------------------------------------------------------------------------------------------------------------------------------------------------------------------|-----------------|------------------------------------------------------------------------------------------------------------------------|------------------------------------------------------------------------------------------------------------------------------------------------------------------------------------------------------|-------------------------------------|------------------------|----------------------------------------------------------------------------------------------------------------------------------------------------------------------------------------------------|--------------------------------------------------------------------------------------------------------------------------------------------------------------------------------------------------------------------------------------------------------------------------------------------|
| Green & Ritter (2000)     | 1941 young men<br>USA<br>% Male: 100<br>Mean age: NR<br>Data from the 1985 wave of the Young Men and Drugs Survey (a nationally representative sample of men from the 1944-1954 birth cohort) | Cross-sectional | Age of cannabis initiation (Obtained retrospectively, age $\leq 16$ as early users), Frequency of current cannabis use | Depressive symptomatology                                                                                                                                                                            | 21 (and 7 months) 15.4 ( $SD = 3$ ) | NA                     | Educational attainment, employment status, marital status, frequency of cannabis use, number of other drugs in the last year, frequency of use of other drugs including tobacco and alcohol        | Early cannabis initiation ( $\leq 16$ years) was weakly associated with higher depression in adulthood and this relationship was mediated by educational attainment, employment status, marital status and other drug use mainly alcohol and tobacco use<br><br>All participants were male |
| Hayatbakhsh et al. (2007) | Data used from Mater University Study of Pregnancy<br><br>participants followed from birth to age 21                                                                                          | Cross-sectional | Age at initiation of cannabis use and frequency of cannabis use measured using self-report                             | Anxiety and depression at age 21 measured using the Young Adult Self-Report version of the Child Behavior Checklist<br><br>Anxiety and depression symptoms were measured using the Youth Self-Report | 15.9 years ( $SD = 1.9$ years)      | 21 years               | Gender, age, mother's age and education, maternal marital status and quality, family income, maternal and adolescent's mental health, maternal substance abuse, adolescent tobacco and alcohol use | Early age of cannabis initiation and frequent cannabis use during adolescence was associated with symptoms of anxiety and depression at age 21<br><br>$OR = 3.4, CI = [1.9, 6.1]$<br><br>No sex differences reported                                                                       |
| Henquet et al. (2004)     | 2437 young people 14 to 24 years of age                                                                                                                                                       | Cohort          | Cannabis use, and predisposition                                                                                       | Psychotic symptoms at follow-up                                                                                                                                                                      | NA                                  | 4 years after baseline | Age, sex, socioeconomic status, urbanicity, childhood trauma, predisposition for psychosis at                                                                                                      | After adjustment for the potential confounders, cannabis                                                                                                                                                                                                                                   |

|                                  |                                                                                  |                     |                              |                                               |                                                     |                      |                                                                                                                                                                                                                                                 |                                                                                                                                                                                                                                                          |
|----------------------------------|----------------------------------------------------------------------------------|---------------------|------------------------------|-----------------------------------------------|-----------------------------------------------------|----------------------|-------------------------------------------------------------------------------------------------------------------------------------------------------------------------------------------------------------------------------------------------|----------------------------------------------------------------------------------------------------------------------------------------------------------------------------------------------------------------------------------------------------------|
|                                  | Germany                                                                          |                     | for psychosis<br>at baseline |                                               |                                                     |                      | baseline, use of other<br>drugs, tobacco, and<br>alcohol                                                                                                                                                                                        | use at baseline increased<br>the cumulative incidence of<br>psychotic<br>symptoms at follow up<br>(Adjusted <i>OR</i> =<br>1.67, 95% <i>CI</i> = 1.13 to<br>2.46)                                                                                        |
|                                  | % Male: 51.3 %                                                                   |                     |                              |                                               |                                                     |                      |                                                                                                                                                                                                                                                 |                                                                                                                                                                                                                                                          |
|                                  | Mean age: 18.3                                                                   |                     |                              |                                               |                                                     |                      |                                                                                                                                                                                                                                                 |                                                                                                                                                                                                                                                          |
|                                  | Population-based<br>sample                                                       |                     |                              |                                               |                                                     |                      |                                                                                                                                                                                                                                                 | No sex differences reported                                                                                                                                                                                                                              |
| Konings et al.<br>(2008)         | 431 participants<br>aged 12 to 23                                                | Cross-<br>sectional | Early cannabis<br>use        | Psychotic<br>symptoms                         | 13.3 ( <i>SD</i> =<br>2.3, <i>range</i> = 7-<br>19) | NA                   | Age, School type,<br>ethnicity, sex, current use<br>of cannabis, use of other<br>drugs                                                                                                                                                          | Exposure before<br>but not after the age of 14<br>years predicted psychotic<br>symptoms<br>(Respectively <i>b</i> : 0.71, 95%<br><i>CI</i> = [0.22, 1.19], <i>p</i> =<br>0.004 and<br><i>b</i> : 0.11, 95%<br><i>CI</i> = [0.57, 0.36], <i>p</i> = 0.66) |
|                                  | Trinidad                                                                         |                     |                              |                                               |                                                     |                      |                                                                                                                                                                                                                                                 | No sex differences reported                                                                                                                                                                                                                              |
|                                  | % Male: 45                                                                       |                     |                              |                                               |                                                     |                      |                                                                                                                                                                                                                                                 |                                                                                                                                                                                                                                                          |
|                                  | Mean age: 16                                                                     |                     |                              |                                               |                                                     |                      |                                                                                                                                                                                                                                                 |                                                                                                                                                                                                                                                          |
|                                  | Population-based<br>recruitment                                                  |                     |                              |                                               |                                                     |                      |                                                                                                                                                                                                                                                 |                                                                                                                                                                                                                                                          |
| Manrique-Garcia<br>et al. (2012) | 45,087 Swedish<br>conscripts with<br>data on cannabis<br>usage at ages 18-<br>20 | Cohort              | Cannabis use                 | Depression and<br>other affective<br>outcomes | NA                                                  | 35-year<br>follow-up | Diagnosis of personality<br>disorders, IQ score,<br>disturbed childhood<br>behavior, social<br>adjustment, risky use of<br>alcohol, smoking, early<br>adulthood socioeconomic<br>position, use of other<br>drugs, being brought up<br>in a city | Only subjects with the<br>highest level of cannabis<br>use had an increased crude<br>hazard ratio for depression<br>( <i>HR</i> = 1.5, 95% <i>CI</i> = [1.0,<br>2.2]), the association<br>disappeared after<br>adjustment for confounders                |
|                                  | Sweden                                                                           |                     |                              |                                               |                                                     |                      |                                                                                                                                                                                                                                                 | No evidence for an<br>increased risk of depression<br>among cannabis users                                                                                                                                                                               |
|                                  | % Male: 100                                                                      |                     |                              |                                               |                                                     |                      |                                                                                                                                                                                                                                                 | All participants were male                                                                                                                                                                                                                               |
|                                  | Mean age: NR<br>(age range: 18-20)                                               |                     |                              |                                               |                                                     |                      |                                                                                                                                                                                                                                                 |                                                                                                                                                                                                                                                          |
|                                  | Data taken from<br>1969-1970 Survey                                              |                     |                              |                                               |                                                     |                      |                                                                                                                                                                                                                                                 |                                                                                                                                                                                                                                                          |



|                          | of Swedish<br>Conscripts)                                                                                                                                                                                                     |                     |               |                               |    |    |                                                                   |                                                                                                                                                                                                                                                                                                                                                                                                                                                                                                                                        |
|--------------------------|-------------------------------------------------------------------------------------------------------------------------------------------------------------------------------------------------------------------------------|---------------------|---------------|-------------------------------|----|----|-------------------------------------------------------------------|----------------------------------------------------------------------------------------------------------------------------------------------------------------------------------------------------------------------------------------------------------------------------------------------------------------------------------------------------------------------------------------------------------------------------------------------------------------------------------------------------------------------------------------|
| McGrath et al.<br>(2010) | 3801 young adults<br>(228 sibling pairs)<br><br>Australia<br><br>% Male: 47.5<br><br>% Male: 60 male<br>sibling pairs<br><br>Mean age: 20.1<br><br>Sibling pair<br>analysis nested<br>within a<br>prospective birth<br>cohort | Case-<br>Control    | Cannabis use  | Psychosis related<br>outcomes | NA | NA | Sex, age, parental mental<br>illness, hallucinations<br>at age 14 | Duration since first<br>cannabis use was<br>associated with psychosis-<br>related outcomes<br><br>For duration since first<br>cannabis use of 6 or more<br>years, there<br>was a significantly<br>increased risk of<br>(1) non-affective psychoses<br>(aOR = 2.2; 95% CI =<br>[1.1, 4.5]),<br>(2) being in the highest<br>quartile of Peters<br>et al Delusions Inventory<br>score (Adjusted OR = 4.2;<br>95% CI = [4.2, 5.8]),<br>(3) hallucinations<br>(Adjusted OR: 2.8; 95% CI =<br>[1.9, 4.1])<br><br>No sex differences reported |
| Medina et al.<br>(2007)  | 16 cannabis user<br>aged 16 to 18<br>years<br><br>USA<br><br>% male: 72<br><br>Mean age: 18<br><br>Recruitment from<br>schools through<br>ads                                                                                 | Cross-<br>sectional | Cannabis use, | Depression                    | NA | NA | Alcohol use, other drug<br>use                                    | Cannabis users<br>demonstrated more<br>depressive symptoms than<br>controls<br><br>Cannabis use and smaller<br>white matter volume<br>each predicted higher<br>levels of depressive<br>symptoms on the Hamilton<br>Depression<br>Rating Scale                                                                                                                                                                                                                                                                                          |

|                      |                                                                                                                                 |        |                             |                                 |    |                                             |                                                                                                                                                                                |                                                                                                                                                                                                                                                                                                                                                                                                                                                                                                                                                                |
|----------------------|---------------------------------------------------------------------------------------------------------------------------------|--------|-----------------------------|---------------------------------|----|---------------------------------------------|--------------------------------------------------------------------------------------------------------------------------------------------------------------------------------|----------------------------------------------------------------------------------------------------------------------------------------------------------------------------------------------------------------------------------------------------------------------------------------------------------------------------------------------------------------------------------------------------------------------------------------------------------------------------------------------------------------------------------------------------------------|
|                      |                                                                                                                                 |        |                             |                                 |    |                                             |                                                                                                                                                                                | Cannabis use interacted with white matter volume in predicting depression scores on the Beck Depression Inventory                                                                                                                                                                                                                                                                                                                                                                                                                                              |
|                      |                                                                                                                                 |        |                             |                                 |    |                                             |                                                                                                                                                                                | No sex differences reported                                                                                                                                                                                                                                                                                                                                                                                                                                                                                                                                    |
| Patton et al. (2002) | 1601 students aged 14-15<br>Australia<br>% Male: 45.6<br>Mean age: 14.5 (at wave 1)<br>A statewide secondary school recruitment | Cohort | Cannabis use in adolescence | Rates of depression and anxiety | NA | 6 years (7 waves)                           | Concurrent use of other substances including alcohol, tobacco, and other illicit substances                                                                                    | Daily use in women associated with an over fivefold increase in the odds of reporting a state of depression and anxiety after adjustment for current use of other substances ( <i>OR</i> = 5.6, 95% <i>CI</i> = [2.6,12])<br><br>Weekly or more frequent cannabis use in teenagers predicted an approximately twofold increase in risk for later depression and anxiety ( <i>OR</i> = 1.9, 95% <i>CI</i> = [1.1,3.3]) after adjustment for confounders<br><br>Daily cannabis use was associated with higher prevalence of depression and anxiety among females |
| Pedersen, (2008)     | 2033 young participants<br>Norway<br>% Male: NR<br>Mean age: NR                                                                 | Cohort | Cannabis use                | Later depression                | NA | 13-year (From early teens to late twenties) | Socioeconomic status, parental relationships and family characteristics, pubertal development, education, school dropout, source of income, conduct problems, alcohol problems | Early adolescence use (< 16 years) had no associations with later depression<br><br>No sex differences reported                                                                                                                                                                                                                                                                                                                                                                                                                                                |

|                        | Population-based, Data from the Young in Norway Longitudinal Study                                |                 |                                              |                                                                                                                            |            |                    |                                                                                                                                                                                                                                                                                 |                                                                                                                                                                                                                                                                                                                                                                                                                                                                |
|------------------------|---------------------------------------------------------------------------------------------------|-----------------|----------------------------------------------|----------------------------------------------------------------------------------------------------------------------------|------------|--------------------|---------------------------------------------------------------------------------------------------------------------------------------------------------------------------------------------------------------------------------------------------------------------------------|----------------------------------------------------------------------------------------------------------------------------------------------------------------------------------------------------------------------------------------------------------------------------------------------------------------------------------------------------------------------------------------------------------------------------------------------------------------|
| Schubart et al. (2011) | 17698 adolescents and young adults<br><br>% Male: 51<br><br>Mean Age: 21.6<br><br>Netherlands     | Cross-sectional | Age at initiation and amount of cannabis use | Subclinical psychosis symptoms,<br><br>Top 10% scores in three symptom dimensions of self-reported psychiatric experiences | < 12 years | NA                 | NA                                                                                                                                                                                                                                                                              | Cannabis use at age 12 or younger strongly associated with a top 10% score on psychotic experiences ( <i>OR</i> 3.1, 95% <i>CI</i> : [2.1–4.3])<br><br>For heavy users (>25 Euro/week) for negative Symptoms: ( <i>OR</i> = 3.4 (95% <i>CI</i> : [2.9–4.1]),<br><br>For psychotic experiences: ( <i>OR</i> = 3.0 (95% <i>CI</i> : [2.4–3.6]),<br><br>For depressive symptoms: ( <i>OR</i> = 2.8 (95% <i>CI</i> : [2.3–3.3])<br><br>No sex differences reported |
| Zammit et al. (2002)   | 50,053 Swedish conscripts<br><br>UK<br><br>% Male: 100<br><br>Mean age: NR (Age range: 18- to 20) | Cohort          | Self-reported use of cannabis                | Admissions to hospital for ICS-8/9 schizophrenia and other psychoses                                                       | NA         | 26 years (1970-96) | Personality traits related to social integration, psychiatric diagnosis at conscription, disturbed behaviour in childhood, IQ, history of alcohol abuse, family history of psychiatric illness, family financial situation, father's occupation, other sociodemographic factors | For subjects with sole cannabis use and no other drugs, this dose–response relationship was significant, and the overall adjusted <i>OR</i> was 1.3 (95% <i>CI</i> = [1.1–1.5], <i>p</i> < .015)<br><br>For those who had used                                                                                                                                                                                                                                 |

---

Record linkage

(brought up in a city,  
paternal age), cigarette  
smoking

cannabis more than 50  
times, the adjusted *OR* rose  
to 6.7 (95%  
*CI* = 2.1–21.7)

All participants were male

---

**Table A.3.2. The Newcastle-Ottawa Scale for Assessing Quality of Observational Studies<sup>3</sup>***Cross-Sectional Studies (Psychosis as Study Outcome)*

| Study Identification            | Selection                        |             |                 |                                         | Comparability of subjects in different outcome groups | Outcome    |                  | Total Score | Quality Characterization |
|---------------------------------|----------------------------------|-------------|-----------------|-----------------------------------------|-------------------------------------------------------|------------|------------------|-------------|--------------------------|
|                                 | Representativeness of the sample | Sample size | Non-respondents | Ascertainment of exposure (Risk Factor) |                                                       | Assessment | Statistical Test |             |                          |
| Estrada et al. (2011)           | *                                | -           | -               | **                                      | -                                                     | **         | *                | 6           | Medium                   |
| Galvez-Buccollini et al. (2012) | *                                | -           | -               | *                                       | **                                                    | **         | *                | 7           | Medium                   |
| Konings et al. (2008)           | **                               | -           | -               | *                                       | *                                                     | *          | *                | 6           | Medium                   |
| Schubart et al. (2011)          | **                               | -           | -               | *                                       | -                                                     | *          | *                | 5           | Medium                   |

<sup>3</sup> An asterisk (\*) indicates the study has the listed characteristic. A dash (-) indicates the above category is not applicable to that study. Studies can receive a maximum of ten stars. Studies are characterized based on scores. Some categories can receive a maximum of two asterisk: Ascertainment of exposure, comparability, outcome assessment (in cross sectional designs); comparability (in case-control and cohort designs).

*Case-Control Studies (Psychosis as Study Outcome)*

| Study Identification  | Selection                |                                 |                       |                        | Comparability of cases and controls on basis of design/analysis | Outcome                |                                                |                   | Total Score | Quality Characterization |
|-----------------------|--------------------------|---------------------------------|-----------------------|------------------------|-----------------------------------------------------------------|------------------------|------------------------------------------------|-------------------|-------------|--------------------------|
|                       | Case Definition Adequate | Representativeness of the cases | Selection of Controls | Definition of Controls |                                                                 | Assessment of exposure | Method of ascertainment for cases and controls | Non-response rate |             |                          |
| McGrath et al. (2010) | *                        | *                               | *                     | *                      | **                                                              | -                      | *                                              | -                 | 7           | Medium                   |

*Cohort Studies (Psychosis as Study Outcome)*

| Study Identification    | Selection                        |                                 |                           |                                 | Comparability of cohorts on the basis of design/analysis | Exposure               |                               |                    | Total Score | Quality Characterization |
|-------------------------|----------------------------------|---------------------------------|---------------------------|---------------------------------|----------------------------------------------------------|------------------------|-------------------------------|--------------------|-------------|--------------------------|
|                         | Representative of Exposed Cohort | Selection of Non-exposed cohort | Ascertainment of Exposure | Outcome Not Present at Baseline |                                                          | Assessment of Outcomes | Sufficient Follow-up Duration | Adequate Follow-up |             |                          |
| Bechtold et al. (2015)  | *                                | *                               | -                         | *                               | **                                                       | *                      | *                             | *                  | 8           | High                     |
| Fergusson et al. (2003) | *                                | -                               | *                         | *                               | **                                                       | *                      | -                             | -                  | 6           | Medium                   |
| Henquet et al. (2004)   | *                                | *                               | *                         | -                               | **                                                       | *                      | *                             | *                  | 8           | High                     |

|                           |   |   |   |   |    |   |   |   |   |        |
|---------------------------|---|---|---|---|----|---|---|---|---|--------|
| Zammit et al. (2002)      | * | * | - | * | ** | * | * | * | 8 | High   |
| Andreasson et al. (1987)  | * | * | - | * | ** | * | * | - | 7 | Medium |
| Di Forti et al. (2014)    | * | * | * | * | *  | * | * | * | 8 | High   |
| Areseneault et al. (2002) | * | * | - | * | ** | * | * | - | 7 | Medium |

*Cross-Sectional Studies (Depression and/or Anxiety as Study Outcome)*

| Study Identification    | Selection                        |             |                 |                                         | Comparability of subjects in different outcome groups | Outcome    |                  | Total Score | Quality Characterization |
|-------------------------|----------------------------------|-------------|-----------------|-----------------------------------------|-------------------------------------------------------|------------|------------------|-------------|--------------------------|
|                         | Representativeness of the sample | Sample size | Non-respondents | Ascertainment of exposure (Risk Factor) |                                                       | Assessment | Statistical Test |             |                          |
| Faiman & Anthony (2012) | *                                | *           | *               | *                                       | **                                                    | *          | *                | 8           | High                     |
| Green & Ritter (2000)   | *                                | -           | -               | *                                       | **                                                    | *          | *                | 6           | Medium                   |
| Medina et al. (2007)    | -                                | -           | -               | *                                       | *                                                     | **         | *                | 5           | Medium                   |

*Case-Control Studies (Depression and/or Anxiety as Study Outcome)*

| Study Identification   | Selection                |                                 |                       |                        | Comparability of cases and controls on basis of design/analysis | Outcome                |                                                |                   | Total Score | Quality Characterization |
|------------------------|--------------------------|---------------------------------|-----------------------|------------------------|-----------------------------------------------------------------|------------------------|------------------------------------------------|-------------------|-------------|--------------------------|
|                        | Case Definition Adequate | Representativeness of the cases | Selection of Controls | Definition of Controls |                                                                 | Assessment of exposure | Method of ascertainment for cases and controls | Non-response rate |             |                          |
| Cloak et al. (2015)    | -                        | *                               | *                     | *                      | *                                                               | -                      | *                                              | -                 | 5           | Medium                   |
| de Graaf et al. (2010) | -                        | *                               | *                     | *                      | **                                                              | -                      | *                                              | -                 | 6           | Medium                   |

*Cohort Studies (Depression and/or Anxiety as Study Outcome)*

| Study Identification      | Selection                        |                                 |                           |                                 | Comparability of cohorts on the basis of design/analysis | Exposure               |                               |                    | Total Score | Quality Characterization |
|---------------------------|----------------------------------|---------------------------------|---------------------------|---------------------------------|----------------------------------------------------------|------------------------|-------------------------------|--------------------|-------------|--------------------------|
|                           | Representative of Exposed Cohort | Selection of Non-exposed cohort | Ascertainment of Exposure | Outcome Not Present at Baseline |                                                          | Assessment of Outcomes | Sufficient Follow-up Duration | Adequate Follow-up |             |                          |
| Degenhardt et al. (2012)  | *                                | *                               | -                         | -                               | *                                                        | *                      | *                             | *                  | 6           | Medium                   |
| Fergusson et al. (1996)   | *                                | *                               | *                         | -                               | *                                                        | -                      | -                             | *                  | 5           | Medium                   |
| Hayatbakhsh et al. (2008) | *                                | *                               | -                         | *                               | **                                                       | -                      | -                             | *                  | 6           | Medium                   |



---

|                                  |   |   |   |   |    |   |   |   |   |        |
|----------------------------------|---|---|---|---|----|---|---|---|---|--------|
| Manrique-Garcia<br>et al. (2012) | * | * | - | * | ** | * | * | * | 8 | High   |
| Patton et al.<br>(2002)          | * | * | - | - | *  | * | * | * | 6 | Medium |
| Pedersen, (2008)                 | * | * | * | - | *  | * | * | * | 7 | Medium |

---
